# Supplementary material
Source: PubMed Central journal article supplement (PMC2858457)
Supplement: NIHMS133846-supplement-1_si_001.pdf [file NIHMS133846-supplement-1_si_001.pdf]

## SUPPORTING INFORMATION

### **An H/D Exchange- and Protease Digestion-Based Screening Assay for the Detection of Protein-Ligand Binding**

Erin D. Hopper,<sup>†</sup> Adrienne M. C. Pittman,<sup>‡</sup> Chandra L. Tucker,<sup>‡</sup>  
Michael J. Campa,<sup>§</sup> Edward F. Patz,<sup>§</sup> and Michael C. Fitzgerald<sup>†</sup>

<sup>†</sup>Department of Chemistry, Duke University, Durham, North Carolina

<sup>‡</sup>Department of Biology, Duke University, Durham, North Carolina

<sup>§</sup>Department of Radiology, Duke University Medical Center, Durham, North Carolina

E-mail: michael.c.fitzgerald@duke.edu

#### CONTENTS:

The Supporting Information includes a table summarizing the SUPREX data used to evaluate the  $\Delta G_f$  and  $m$ -values of the 11 AGTmi peptide fragments. It also includes six figures containing control screening data for CypA and AGTmi.

**Table S-1: Transition midpoints of SUPREX curves obtained on apo-AGTmi using the SUPREX-protease digestion protocol.**

| Exchange Time (min) | 3221 Da Fragment 1 | 3334 Da Fragment 2 | 3531 Da Fragment 3 | 3965 Da Fragment 4 | 4078 Da Fragment 5 | 4564 Da Fragment 6 | 5288 Da Fragment 7 | 5404 Da Fragment 8 | 5951 Da Fragment 9 | 6197 Da Fragment 10 | 6941 Da Fragment 11 |
|---------------------|--------------------|--------------------|--------------------|--------------------|--------------------|--------------------|--------------------|--------------------|--------------------|---------------------|---------------------|
| 0.5                 | 2.0                | 2.0                | 1.9                | 2.0                | 2.1                | 1.7                | 2.0                | 1.9                | 1.7                | 1.7                 | 1.8                 |
| 2                   | 1.9                | 1.9                | 1.8                | 1.8                | 1.8                | 1.5                | 1.8                | 1.7                | 1.7                | 1.5                 | 1.7                 |
| 5                   | 1.7                | 1.7                | 1.6                | 1.7                | 1.6                | 1.3                | 1.7                | 1.5                | 1.5                | 1.4                 | 1.5                 |
| 25                  | 1.4                | 1.5                | 1.4                | 1.4                | 1.4                | 1.0                | 1.5                | 1.3                | 1.4                | 1.3                 | 1.4                 |
| 40                  | 1.4                | 1.4                | 1.3                | 1.2                | 1.2                | 1.1                | 1.5                | 1.2                | 1.4                | 1.2                 | 1.3                 |

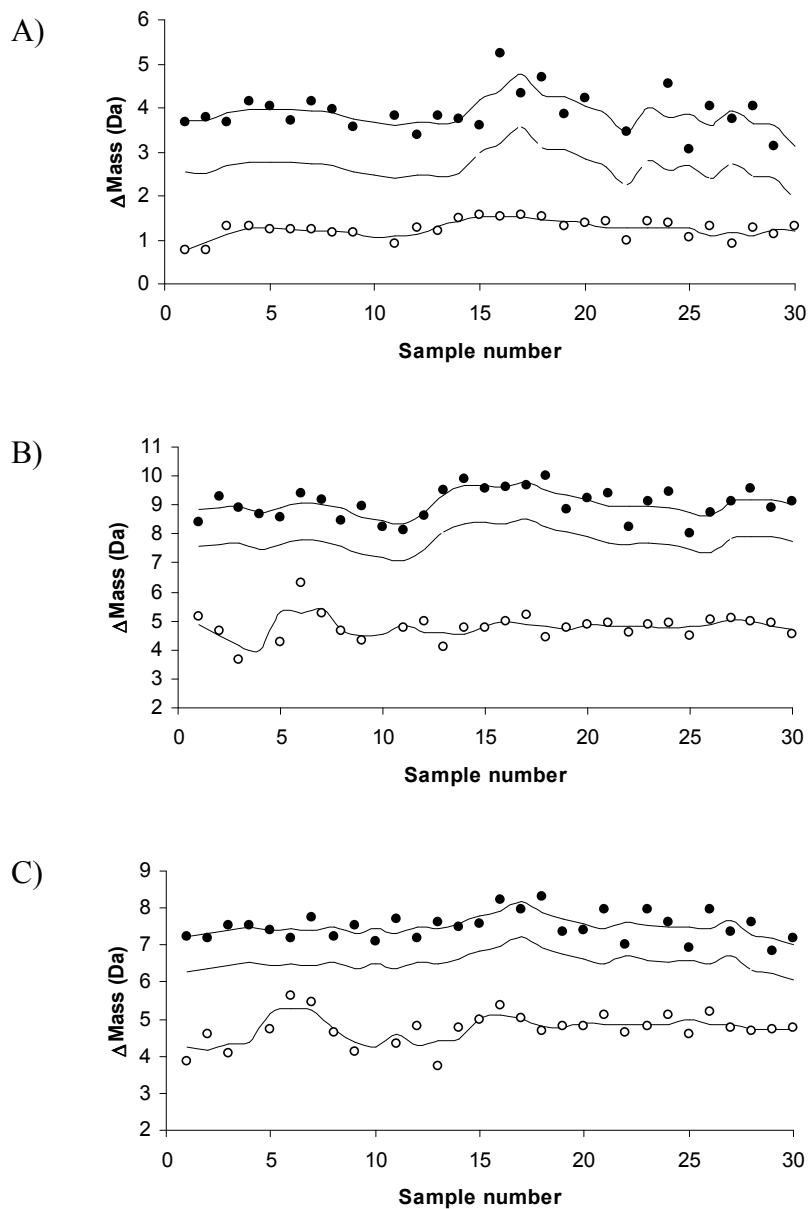

Figure S-1. Control screening data for CypA peptide fragments 1 (A), 3 (B) and 4 (C).  $\Delta$ Mass values are plotted for negative controls (filled circles) and positive controls (open circles), and the moving average for each control is represented by a solid line. The dashed line indicates the suggested cutoff values for each peptide.

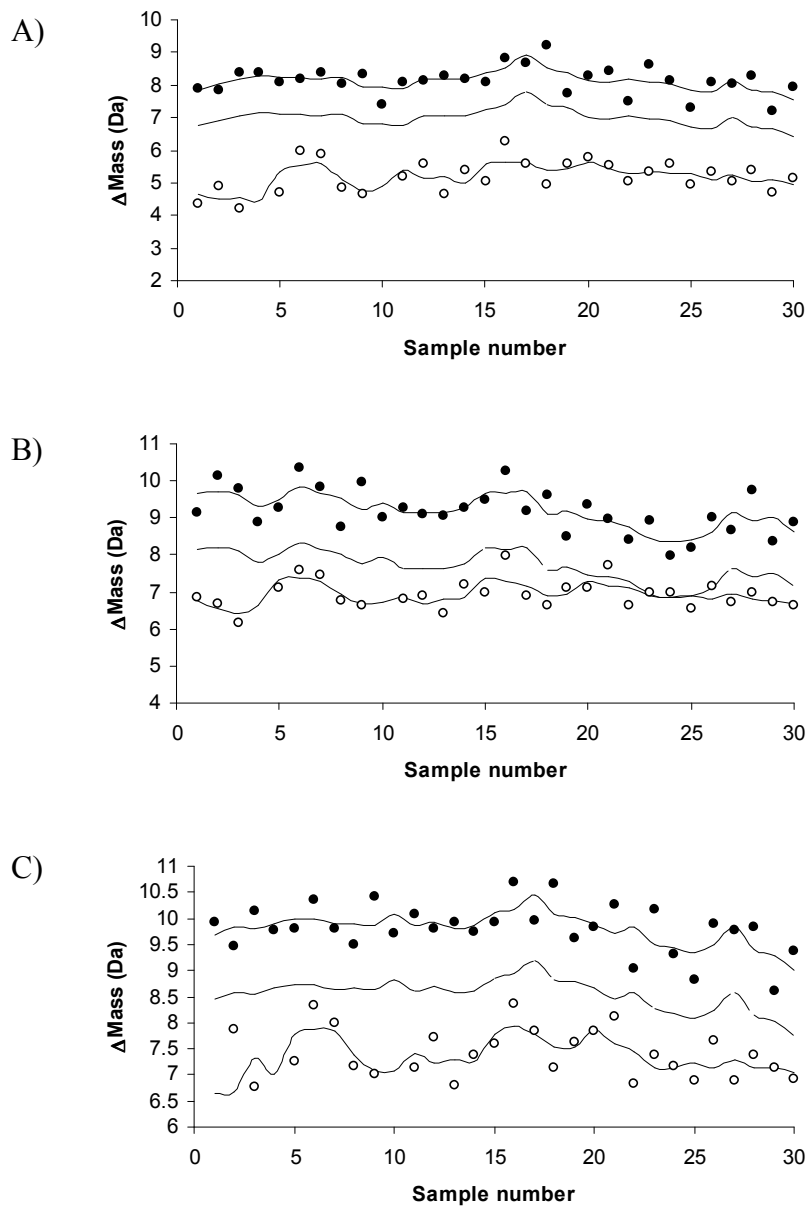

Figure S-2. Control screening data for CypA peptide fragments 5 (A), 6 (B), and 7 (C).  $\Delta$ Mass values are plotted for negative controls (filled circles) and positive controls (open circles), and the moving average for each control is represented by a solid line. The dashed line indicates the suggested cutoff values for each peptide.

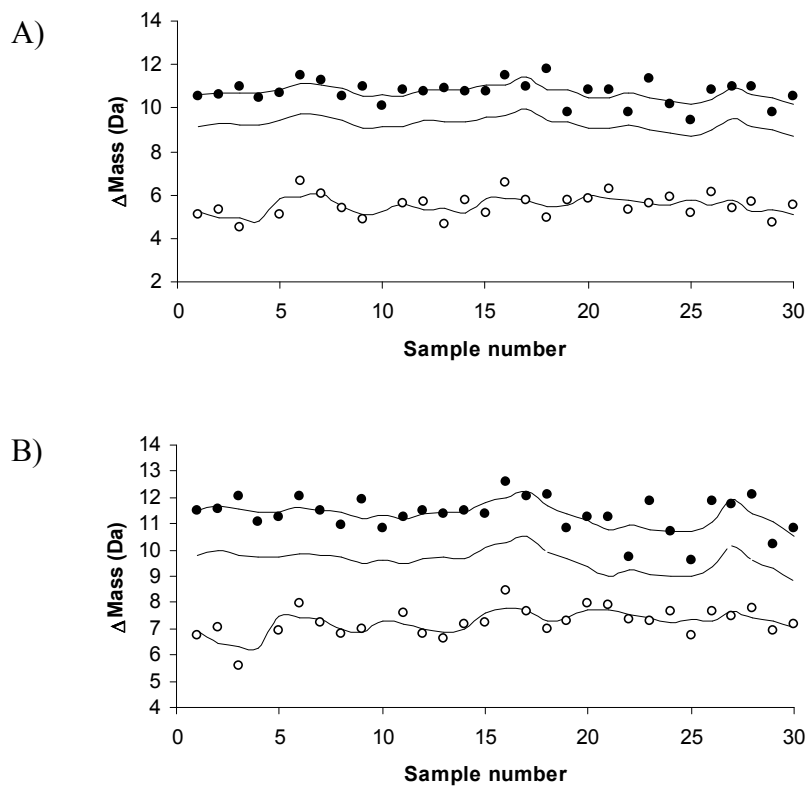

Figure S-3. Control screening data for CypA peptide fragments 8 (A) and 9 (B).  $\Delta\text{Mass}$  values are plotted for negative controls (filled circles) and positive controls (open circles), and the moving average for each control is represented by a solid line. The dashed line indicates the suggested cutoff values for each peptide.

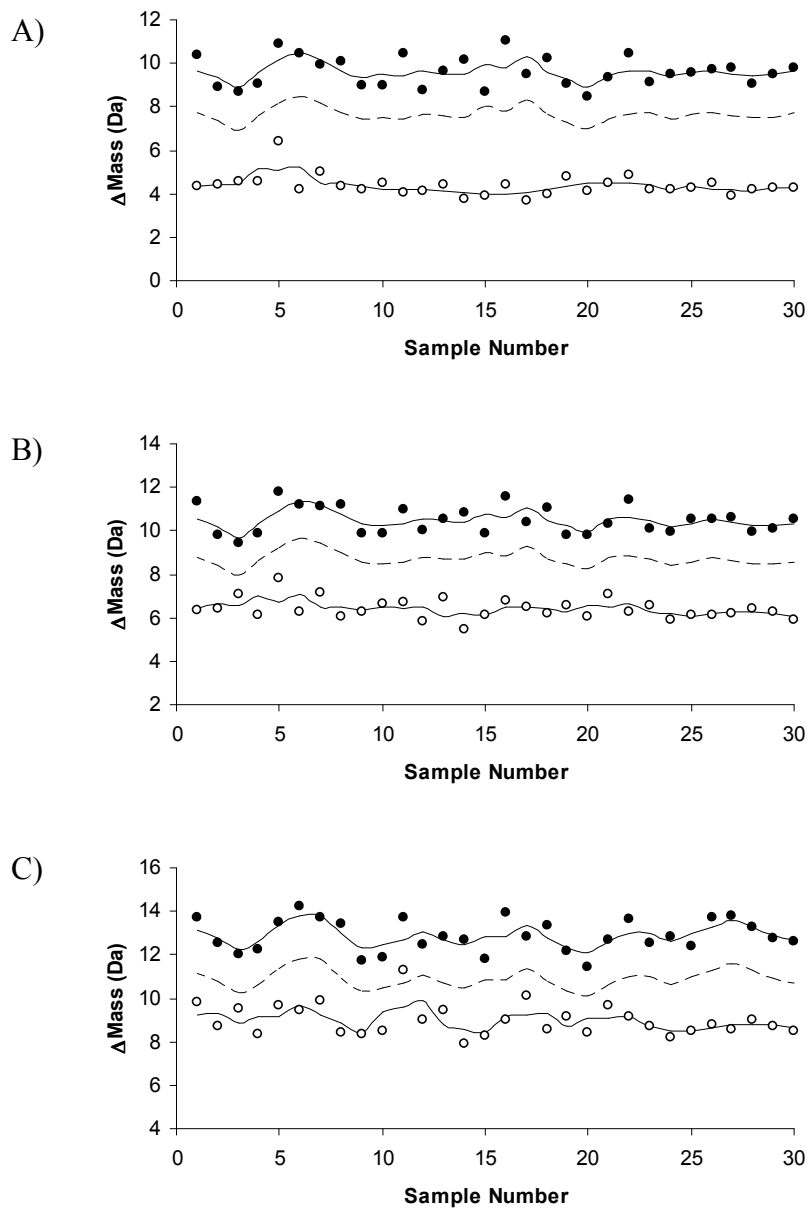

Figure S-4. Control screening data for AGTmi peptide fragments 1 (A), 3 (B), and 4 (C).  $\Delta$ Mass values are plotted for negative controls (filled circles) and positive controls (open circles), and the moving average for each control is represented by a solid line. The dashed line indicates the suggested cutoff values for each peptide.

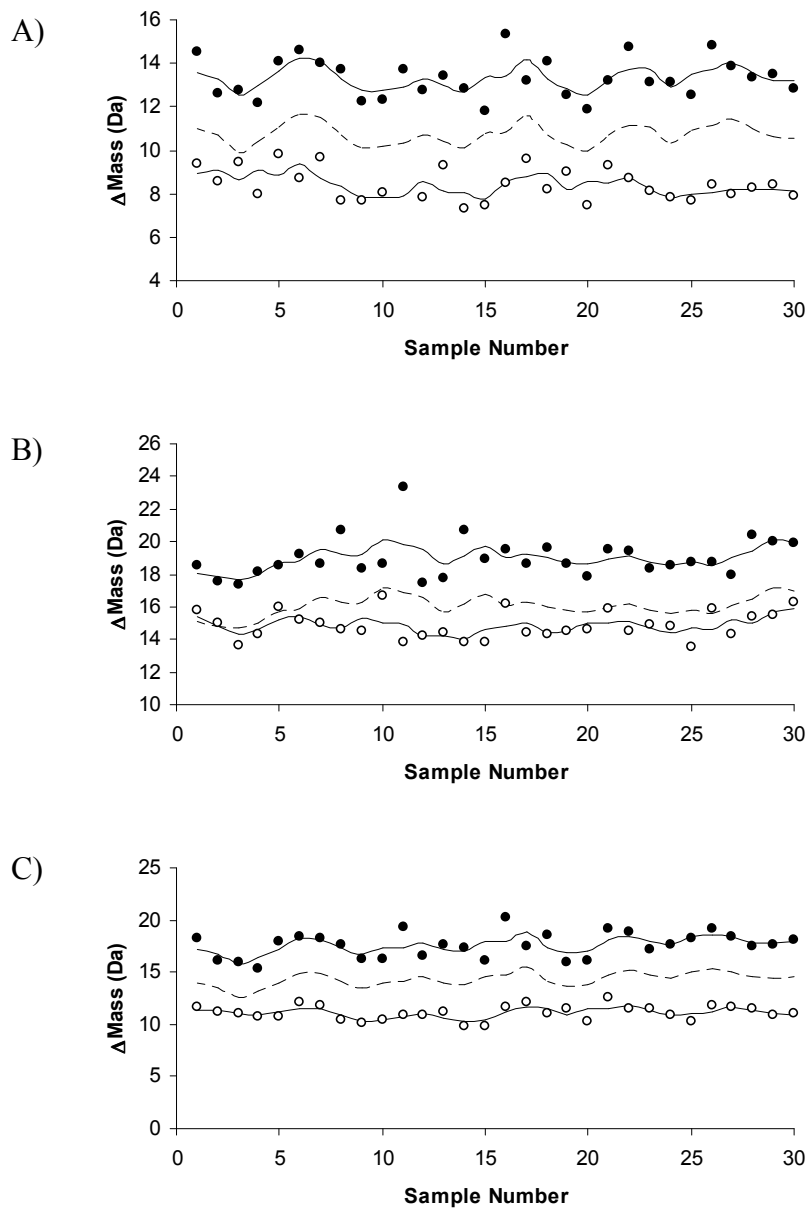

Figure S-5. Control screening data for AGTmi peptide fragments 5 (A), 6 (B), and 7 (C).  $\Delta$ Mass values are plotted for negative controls (filled circles) and positive controls (open circles), and the moving average for each control is represented by a solid line. The dashed line indicates the suggested cutoff values for each peptide.

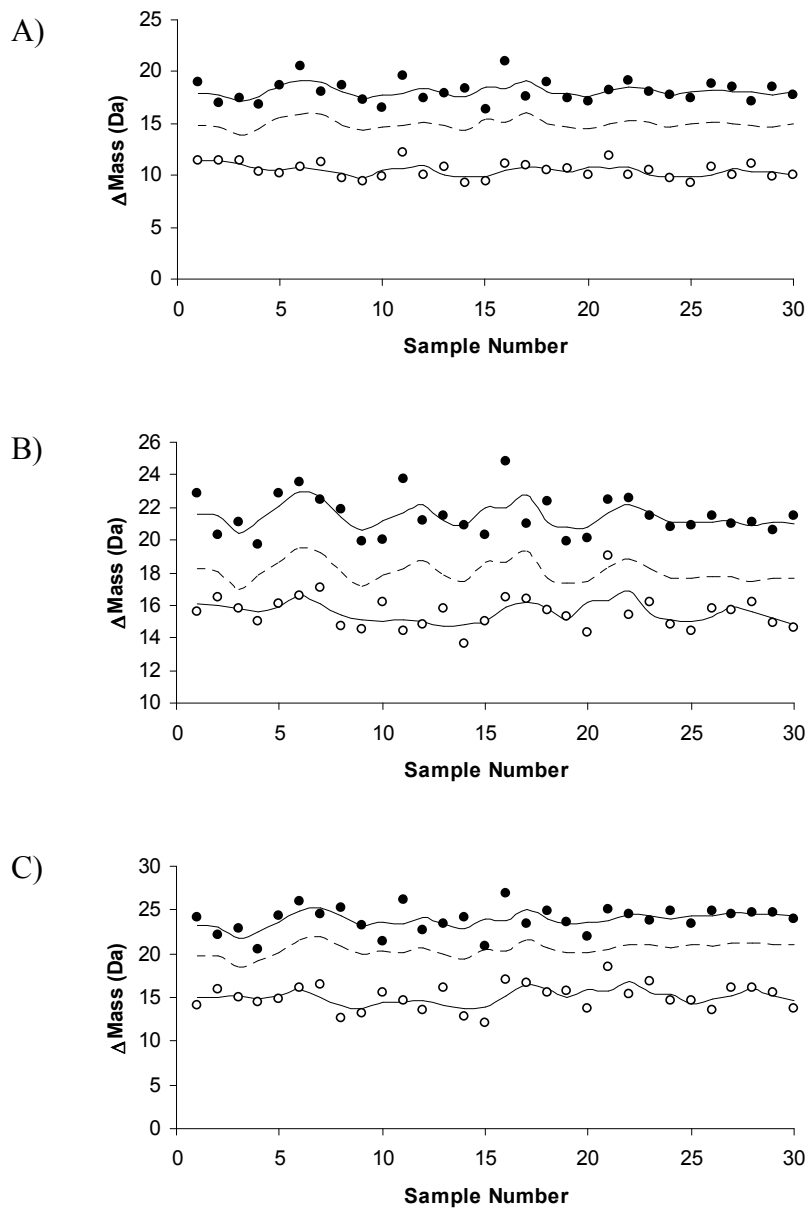

Figure S-6. Control screening data for AGTmi peptide fragments 8 (A), 9 (B), and 10 (C).  $\Delta$ Mass values are plotted for negative controls (filled circles) and positive controls (open circles), and the moving average for each control is represented by a solid line. The dashed line indicates the suggested cutoff values for each peptide.
